# Supplementary material
Source: publisher site journal article supplement (https://www.dovepress.com/article/396549)
Supplement: Supplementary file 1 [file get_supplementary_file.php]

**Supplement Table 1. Correlation between biomarkers at baseline and 3-month follow-up in patients with chronic obstructive pulmonary disease**

|  | **Variables** | **R** | **ICC** | **P-value** |
| --- | --- | --- | --- | --- |
| Lung function and physical performance | FEV1 | 0.920 | 0.959 | <0.001 |
| FVC | 0.792 | 0.884 | <0.001 |
| HGS | 0.743 | 0.843 | <0.001 |
| 6MWD | 0.837 | 0.746 | <0.001 |
| Reported symptoms and health-related quality of life | mMRC | 0.673 | 0.794 | <0.001 |
| CAT | 0.864 | 0.933 | <0.001 |
| SF-12 | 0.794 | 0.881 | <0.001 |
| SGRQ | 0.947 | 0.976 | <0.001 |
| VSAQ | 0.804 | 0.880 | <0.001 |
| Inflammation | CRP | 0.589 | 0.899 | <0.001 |
| ESR | 0.592 | 0.749 | <0.001 |
| Fibrinogen | 0.699 | 0.805 | <0.001 |
| NLR | 0.745 | 0.613 | <0.001 |
| Eos % | 0.636 | 0.778 | <0.001 |
| Eos abs | 0.617 | 0.766 | <0.001 |
| WBC | 0.817 | 0.480 | 0.002 |

6MWD=6-minute walking distance; CAT=Chronic Obstructive Pulmonary Disease Assessment Test; CRP=C-reactive protein; Eos=eosinophil; Eos abs=eosinophil absolute count; ESR=erythrocyte sedimentation rate; FEV1=forced expiratory volume in one second; FVC=forced vital capacity; HGS=handgrip strength; ICC=intraclass correlation coefficient; NLR=neutrophil-lymphocyte ratio; mMRC=modified Medical Research Council; R=Pearson's r or Spearman's rho; SF-12=Medical Outcomes Trust Short Form 12; SGRQ=Saint George's Respiratory Questionnaire; VSAQ=Veterans Specific Activity Questionnaire; WBC=white blood cell count.

**Supplement Table 2. The number of worse outliers with or without past or 1-year exacerbation in patients with chronic obstructive pulmonary disease***

|  |  | **Past E (+)**  **(n=22)** | **Past E (-)**  **(n=65)** | **P-value** | **1-yr E (+)**  **(n=23)** | **1-yr E (-)**  **(n=43)** | **P-value** |
| --- | --- | --- | --- | --- | --- | --- | --- |
| **The number (percentage) of worse outliers for each variable** | FEV1 | 1 (4.5) | 2 (3.1) | 1.000 | 1 (4.3) | 0 (0.0) | 0.348 |
| FVC | 1 (4.5) | 1 (1.5) | 0.444 | 0 (0.0) | 2 (4.7) | 0.542 |
| HGS | 0 (0.0) | 2 (3.1) | 1.000 | 0 (0.0) | 1 (2.3) | 1.000 |
| 6MWD | 0 (0.0) | 0 (0.0) | NA | 0 (0.0) | 0 (0.0) | NA |
| mMRC | 0 (0.0) | 5 (7.7) | 0.324 | 1 (4.3) | 2 (4.7) | 1.000 |
| CAT | 0 (0.0) | 8 (12.3) | 0.194 | 2 (8.7) | 2 (4.7) | 0.606 |
| SF-12 | 2 (9.0) | 4 (6.2) | 0.640 | 2 (8.7) | 2 (4.7) | 0.606 |
| SGRQ | 1 (4.5) | 1 (1.5) | 0.448 | 1 (4.3) | 0 (0.0) | 0.338 |
| VSAQ | 0 (0.0) | 4 (6.2) | 0.568 | 1 (4.3) | 1 (2.3) | 1.000 |
| CRP | 0 (0.0) | 2 (3.1) | 1.000 | 0 (0.0) | 1 (2.3) | 1.000 |
| ESR | 0 (0.0) | 4 (6.2) | 0.568 | 0 (0.0) | 2 (4.7) | 1.000 |
| Fibrinogen | 0 (0.0) | 7 (7.7) | 0.187 | 0 (0.0) | 4 (9.3) | 0.289 |
| NLR | 0 (0.0) | 3 (4.6) | 1.000 | 2 (8.7) | 0 (0.0) | 0.104 |
| Eos % | 0 (0.0) | 2 (3.1) | 1.000 | 2 (8.7) | 0 (0.0) | 0.104 |
| Eos abs | 0 (0.0) | 1 (1.5) | 1.000 | 1 (4.3) | 0 (0.0) | 0.328 |
| WBC | 1 (4.5) | 1 (1.5) | 0.426 | 1 (4.3) | 1 (2.3) | 1.000 |
| Lung function or Functional status | 1 (4.5) | 5 (7.7) | 1.000 | 1 (4.3) | 3 (7.0) | 1.000 |
| Symptom or Health status | 3 (13.6) | 14 (21.5) | 0.543 | 6 (26.1) | 5 (11.6) | 0.171 |
| Inflammation | 1 (4.5) | 13 (20.0) | 0.106 | 4 (17.4) | 5 (11.6) | 0.708 |

*Worse outliers were defined by a difference > 1.645 standard deviations (SD) above the mean difference at baseline and 3-month follow-up and by worsening values of assessed biomarkers on their 3-month follow-up. 1-yr E=any exacerbation during the 3-12 months after enrollment; 6MWD=6-minute walking distance; CAT=Chronic Obstructive Pulmonary Disease Assessment Test; CRP=C-reactive protein; Eos=eosinophil; Eos abs=eosinophil absolute count; ESR=erythrocyte sedimentation rate; FEV1=forced expiratory volume in one second; FVC=forced vital capacity; HGS=handgrip strength; mMRC=modified Medical Research Council; NLR=neutrophil-lymphocyte ratio; Past E=any exacerbation during the 3-12 months prior to enrollment; SF-12=Medical Outcomes Trust Short Form 12; SGRQ=Saint George's Respiratory Questionnaire; VSAQ=Veterans Specific Activity Questionnaire; WBC=white blood cell count.
